# Supplementary material for: Safety and efficacy of mass drug administration with a single-dose triple-drug regimen of albendazole + diethylcarbamazine + ivermectin for lymphatic filariasis in Papua New Guinea: An open-label, cluster-randomised trial
Source: PubMed Central journal article supplement (PMC8863226; doi:10.1371/journal.pntd.0010096), 2022-02-09
Supplement: pntd.0010096.s001.pdf [file pntd.0010096.s001.pdf]

**S1 Table.** Medication dosing table.

| <b>MEDICATION DOSING CHART (by weight)</b> |                    |
|--------------------------------------------|--------------------|
| <b>Albendazole</b>                         |                    |
| ≥ 15 kg                                    | 1 tablet (400 mg)  |
| <b>Diethylcarbamazine (6mg/kg)</b>         |                    |
| 15-25 kg                                   | 1 tablet (100 mg)  |
| 26-41 kg                                   | 2 tablets (200 mg) |
| 42-58 kg                                   | 3 tablets (300 mg) |
| 59-75 kg                                   | 4 tablets (400 mg) |
| 76-92 kg                                   | 5 tablets (500 mg) |
| ≥ 93 kg                                    | 6 tablets (600 mg) |
| <b>Ivermectin (200 µg/kg)</b>              |                    |
| 15-23 kg                                   | 1 tablet (3 mg)    |
| 24-38 kg                                   | 2 tablets (6 mg)   |
| 39-53 kg                                   | 3 tablets (9 mg)   |
| 54-68 kg                                   | 4 tablets (12 mg)  |
| 69-83 kg                                   | 5 tablets (15 mg)  |
| 84-98 kg                                   | 6 tablets (18 mg)  |
| ≥ 99 kg                                    | 7 tablets (21 mg)  |
