# Supplementary material for: Safety and efficacy of mass drug administration with a single-dose triple-drug regimen of albendazole + diethylcarbamazine + ivermectin for lymphatic filariasis in Papua New Guinea: An open-label, cluster-randomised trial
Source: PubMed Central journal article supplement (PMC8863226; doi:10.1371/journal.pntd.0010096), 2022-02-09
Supplement: pntd.0010096.s002.pdf [file pntd.0010096.s002.pdf]

**S2 Table. Adverse event grading chart**

| Symptoms/Signs                             | Grades                                            |                                                                                     |                                                                                                |                                                                                 |
|--------------------------------------------|---------------------------------------------------|-------------------------------------------------------------------------------------|------------------------------------------------------------------------------------------------|---------------------------------------------------------------------------------|
|                                            | 1. Mild                                           | 2. Moderate                                                                         | 3. Severe                                                                                      | 4. Life-threatening                                                             |
| Fever                                      | 38.0 – 39.0°C                                     | 39.1 – 40.0°C                                                                       | > 40.0°C                                                                                       | > 40.0°C for > 48 hrs                                                           |
| Dizziness, giddiness, or fainting          | Mild, not interfering with work or school         | Moderate, unable to work or attend school for 1 day, but no fainting                | Any loss of consciousness (fainting)                                                           | -                                                                               |
| Headache                                   | Mild pain not interfering with work or school     | Moderate pain; pain or analgesics interfering with ability to work or attend school | Severe pain; pain or analgesics interfering with activities of daily living                    | Disabling, duration > 48 hrs.                                                   |
| Fatigue                                    | Mild, not interfering with work or school         | Moderate, unable to work or attend school at least 1 day                            | Severe, unable to perform activities of daily living, > 1 day                                  | Required hospitalization                                                        |
| Difficulty breathing (wheezing or dyspnea) | Mild, not interfering with work or school         | Moderate, unable to work or attend school for 1 day                                 | Severe, more than 1 day and required transfer to clinic or hospital                            | Hospitalization or respiratory failure requiring mechanical ventilation         |
| Cough                                      | Mild, relieved by non-prescription medication     | Requiring narcotic antitussive                                                      | Severe cough or coughing spasms, poorly controlled by treatment                                | Hospitalization or respiratory failure requiring mechanical ventilation         |
| Joint or muscle pain                       | Mild pain not interfering with work or school     | Moderate pain; pain or analgesics interfering with ability to work or attend school | Severe pain; pain or analgesics interfering with activities of daily living                    | Disabling, duration > 48 hrs.                                                   |
| Muscle Weakness                            | Mild, not interfering with work or school         | Moderate, unable to work or attend school at least 1 day                            | Severe, unable to perform activities of daily living, > 1 day                                  | Required hospitalization                                                        |
| Rash                                       | Localized rash (covers only one part of the body) | Diffuse rash (covers multiple parts of the body)                                    | Diffuse rash (covers multiple parts of the body) AND has any blisters or ulcers or mouth sores | Extensive areas with blisters or ulcers OR peeling or blackening of skin        |
| Itching skin                               | Mild, not interfering with work or school         | Moderate, unable to work or attend school 1 day                                     | Severe, unable to work/school >1 day                                                           | Disabling >48hrs                                                                |
| Pain of skin                               | Mild, not interfering with work or school         | Moderate, unable to work or attend school 1 day                                     | Severe, unable to work/school >1 day                                                           | Disabling >48hrs                                                                |
| Swollen or painful nodes (armpit or groin) | Mild, not interfering with work or school         | Moderate, unable to work or attend school 1 day                                     | Severe, unable to work/school >1 day                                                           | Severe, limiting activities of daily living (unable to walk) > 2 days           |
| Men only: testicular or scrotal pain       | Mild, not interfering with work or school         | Moderate, unable to work or attend school 1 day                                     | Severe, unable to work/school >1 day                                                           | Severe, limiting activities of daily living (unable to walk) > 2 days           |
| Nausea                                     | Able to eat                                       | Oral intake significantly decreased                                                 | No significant intake, requiring IV fluids                                                     | -                                                                               |
| Vomiting                                   | 1 episode in the last 24 hours                    | 2-5 episodes in the last 24 hours                                                   | ≥ 6 episodes in the last 24hours, or need for IV fluids (Outpatient)                           | Hemodynamic collapse or overnight hospitalization                               |
| Diarrhea                                   | Increase of < 4 stools/day over pre-treatment     | Increase of 4-6 stools/day, or nocturnal stools                                     | Increase of ≥ 7 stools/day or need for outpatient parenteral support for dehydration           | Physiologic consequences with hemodynamic collapse or requiring hospitalization |

| Symptoms/Signs                                | Grades                                        |                                                                                     |                                                                             |                                                                       |
|-----------------------------------------------|-----------------------------------------------|-------------------------------------------------------------------------------------|-----------------------------------------------------------------------------|-----------------------------------------------------------------------|
|                                               | 1. Mild                                       | 2. Moderate                                                                         | 3. Severe                                                                   | 4. Life-threatening                                                   |
| Abdominal pain                                | Mild pain not interfering with work or school | Moderate pain; pain or analgesics interfering with ability to work or attend school | Severe pain; pain or analgesics interfering with activities of daily living | Disabling, duration > 48 hrs.                                         |
| Unusual swelling (beyond baseline lymphedema) | Mild, not interfering with work or school     | Moderate, unable to work or attend school 1 day                                     | Severe, unable to work/school >1 day                                        | Severe, limiting activities of daily living (unable to walk) > 2 days |
| Other illness or symptoms                     | Mild, not interfering with work or school     | Moderate, unable to work or attend school at least 1 day                            | Unable to perform activities of daily living, > 1day                        | Required hospitalization                                              |
