# Supplementary material for: Safety and efficacy of mass drug administration with a single-dose triple-drug regimen of albendazole + diethylcarbamazine + ivermectin for lymphatic filariasis in Papua New Guinea: An open-label, cluster-randomised trial
Source: PubMed Central journal article supplement (PMC8863226; doi:10.1371/journal.pntd.0010096), 2022-02-09
Supplement: pntd.0010096.s006.pdf [file pntd.0010096.s006.pdf]

**S6 Table:** Baseline demographic characteristics and infection status of participants (n=368) lost to follow-up at 12m for nested efficacy analysis.

|                                     |                                                      | <b>Total n (%)</b> | <b>DA n (%)</b> | <b>IDA n (%)</b> |
|-------------------------------------|------------------------------------------------------|--------------------|-----------------|------------------|
| <b>Lost to follow-up</b>            | Total participants <sup>a</sup>                      | 368 (36)           | 182 (37)        | 186 (36)         |
| <b>Gender <sup>b</sup></b>          | Female                                               | 131 (33)           | 71 (35)         | 60 (31)          |
|                                     | Male                                                 | 237 (39)           | 111 (38)        | 126 (39)         |
| <b>Age (years) <sup>c</sup></b>     | 5-9                                                  | 7 (30)             | 4 (31)          | 3 (30)           |
|                                     | 10-19                                                | 62 (40)            | 35 (44)         | 27 (36)          |
|                                     | 20-29                                                | 90 (38)            | 41 (40)         | 49 (37)          |
|                                     | 30-39*                                               | 88 (36)            | 35 (30)         | 53 (41)          |
|                                     | 40-49                                                | 62 (37)            | 38 (40)         | 24 (33)          |
|                                     | 50-59                                                | 39 (32)            | 21 (34)         | 18 (30)          |
|                                     | 60+                                                  | 20 (31)            | 8 (36)          | 12 (28)          |
| <b>Weight (kg)</b>                  | Median (IQR)                                         | 55 (50-60)         | 55 (49-60)      | 56 (52-62)       |
| <b>BMI (kg/m<sup>2</sup>)</b>       | Median (IQR)                                         | 22 (21-24)         | 22 (21-24)      | 22 (21-24)       |
| <b>LF – CFA status <sup>c</sup></b> | CFA positive <sup>c</sup>                            | 368 (36)           | 182 (37)        | 186 (36)         |
|                                     | FTS Score 1 <sup>d</sup>                             | 106 (37)           | 52 (38)         | 54 (36)          |
|                                     | FTS Score 2                                          | 147 (39)           | 76 (42)         | 71 (36)          |
|                                     | FTS Score 3                                          | 113 (33)           | 52 (31)         | 61 (35)          |
| <b>Mf status</b>                    | Mf negative <sup>b</sup>                             | 295 (38)           | 154 (41)        | 141 (35)         |
|                                     | Mf positive <sup>b*</sup>                            | 61 (30)            | 23 (24)         | 38 (36)          |
|                                     | Mf geometric mean <sup>c^</sup><br>(Mf/ml) and range | 123 (17-1083)      | 168 (17-1083)   | 101 (17-950)     |

<sup>a</sup> denominator is the number of CFA+ participants at baseline (n=1013) that the study team tried to follow-up and re-assess at 1-year post-MDA

<sup>b</sup> denominator is women (n=395) and men (n=618) who were CFA+ at baseline

<sup>c</sup> denominator is the number of participants in each category who were CFA+ at baseline

<sup>d</sup> denominator is the number of participants with FTS Score 1, 2, 3 at baseline

<sup>e</sup> denominator is the number of participants with Mf negative or positive at baseline

\* p-value between 0.05-0.1, 2-tailed Fischer exact test ; p-value>0.1 for all other variables

<sup>^</sup>p-value 0.06, 2-sample t-test.
